# Supplementary material
Source: publisher site journal article supplement (https://www.spandidos-publications.com/6962/downloadSupplementary)
Supplement: Supplementary file 1 [file downloadSupplementary]

## Sheet: Sheet1
Table SII. Up-regulated genes 6 h after LIPUS (low-intensity pulsed ultrasound) exposure.
Gene symbol	Fold-change	p value	TPM (Transcripts per million reads)						Gene title
			Ctr-1	Ctr-2	Ctr-3	LIPUS-1	LIPUS-2	LIPUS-3
CYP1A1	6.35	0.029	2.347	2.478	3.181	25.64	37.152	4.984	cytochrome P450, family 1, subfamily a, polypeptide 1(Cyp1a1)
ZNF540	5.91	0.008	4.028	1.093	1.319	13.311	9.323	9.637	zinc finger protein 540(ZNF540)
IMMP1L	4.22	0.001	0.71	1.035	1.334	5.506	3.435	5.481	inner mitochondrial membrane peptidase subunit 1(immp1l)
UGT3	3.43	0.029	0.882	2.767	0.972	7.501	4.549	3.266	UDP-glucuronosyltransferase(ugt3)
ZNF225	3.01	0.032	1.177	3.376	1.032	4.601	5.555	4.397	zinc finger protein 225(ZNF225)
EDN2	2.87	0.019	2.564	0.836	1.2	3.997	5.212	3.491	endothelin 2(EDN2)
AFF2	2.69	0.035	1.911	1.614	4.289	8.603	6.438	4.63	AF4/FMR2 family, member 2(Aff2)
TNFRSF11B	2.56	0.003	18.145	23.726	15.363	48.59	58.761	38.708	TNF receptor superfamily member 11b(TNFRSF11B)
DPP10	2.48	0.001	0.111	0.43	0.441	2.58	2.811	2.092	dipeptidyl peptidase like 10(Dpp10)
ZNF776	2.35	0.005	1.774	2.662	2.876	5.068	5.059	6.853	zinc finger protein 776(ZNF776)
SOX11.L	2.3	0.016	0.723	0	1.759	3.623	2.676	2.222	SRY-box 11 L homeolog(sox11.L)
UBASH3B	2.19	0.006	9.244	8.857	7.94	13.592	22.78	22.022	ubiquitin associated and SH3 domain containing, B(Ubash3b)
P2RX4	2.16	0.002	2.6	3.05	3.748	7.671	5.958	6.581	purinergic receptor P2X 4(P2rx4)
HHV8GK18_GP81	2.14	0.027	1.922	2.147	1.739	2.794	6.454	3.897	ORF73(HHV8GK18_gp81)
ZFP41	2.13	0.027	3.279	7.383	4.652	9.099	9.953	12.049	zinc finger protein 41(Zfp41)
CD209	2.12	0.032	1.515	0	2.278	3.38	2.599	3.756	CD209 molecule(CD209)
RAP1BL	2.02	0.004	2.581	3.768	3.514	5.983	6.235	7.506	RAP1B like (pseudogene)(RAP1BL)
CLDN6	1.96	0.016	109.452	102.543	79.607	190.532	250.918	141.444	claudin 6(CLDN6)
HECTD4	1.96	0.049	1.579	1.519	1.871	4.138	4.253	1.923	HECT domain E3 ubiquitin protein ligase 4(HECTD4)
SP8B	1.93	0.019	4.716	3.731	2.443	6.508	7.108	6.65	sp8 transcription factor b(sp8b)
SLC16A6	1.92	0.007	3.581	4.418	2.894	6.035	6.75	7.961	solute carrier family 16 (monocarboxylic acid transporters), member 6(Slc16a6)
CRADD	1.92	0.047	1.7	1.024	0.341	2.644	2.908	1.59	CASP2 and RIPK1 domain containing adaptor with death domain(Cradd)
EDN3	1.91	0.043	6.198	4.338	3.177	8.995	10.548	6.275	endothelin 3(EDN3)
EXOG	1.88	0.006	1.901	2.028	2.284	3.885	4.809	3.136	Nuclease EXOG, mitochondrial(exog)
POC5.L	1.86	0.006	1.659	1.118	1.13	2.235	2.366	2.557	POC5 centriolar protein L homeolog(poc5.L)
PYM1B	1.83	0.032	0.967	1.107	1.013	1.801	1.37	2.801	partner of Y14 and mago B-like(pym1b)
PCMTD2	1.83	0.044	2.358	2.186	1.932	4.401	2.554	5.446	protein-L-isoaspartate (D-aspartate) O-methyltransferase domain containing 2(PCMTD2)
AHRR	1.82	0.016	7.893	7.259	12.21	17.591	16.315	14.718	aryl-hydrocarbon receptor repressor(AHRR)
ZNF25	1.81	0.031	3.571	3.878	3.466	9.865	5.421	5.354	zinc finger protein 25(ZNF25)
MBLAC1.S	1.81	0.031	1.779	1.767	1.106	2.193	2.75	3.403	metallo-beta-lactamase domain containing 1 S homeolog(mblac1.S)
NDUFAF4	1.8	0.015	2.99	3.143	2.976	6.571	3.946	6.245	NADH:ubiquinone oxidoreductase complex assembly factor 4(NDUFAF4)
DCAF17	1.77	0.032	1.161	1.363	0.977	2.65	2.26	1.465	ddb1 and cul4 associated factor 17(dcaf17)
MITD1	1.76	0.028	1.329	2.324	1.447	2.599	3.308	2.826	microtubule interacting and trafficking domain containing 1(Mitd1)
FERMT1	1.75	0.046	1.576	1.363	1.774	2.051	4.072	2.465	fermitin family member 1(Fermt1)
ENG	1.75	0.041	13.88	16.576	13.363	26.113	35.502	17.825	endoglin(eng)
RBBP8	1.74	0.026	1.828	1.506	1.348	3.611	2.605	2.094	retinoblastoma binding protein 8(rbbp8)
PTGIS	1.73	0.02	25.772	20.476	19.109	45.606	40.346	28.572	prostaglandin I2 (prostacyclin) synthase(ptgis)
TLN2	1.72	0.018	6.544	6.864	10.109	11.611	13.004	15.409	talin 2(Tln2)
HINFP	1.72	0.005	5.519	5.838	5.667	11.978	9.406	8.178	histone H4 transcription factor(HINFP)
ZNF750	1.71	0.038	6.241	4.598	3.512	9.683	7.586	6.82	zinc finger protein 750(ZNF750)
ZNF425	1.7	0.046	0.981	0	1.679	1.843	1.773	2.544	zinc finger protein 425(ZNF425)
DET1	1.7	0.02	1.119	0.873	0.965	2.393	1.462	1.568	DET1 partner of COP1 E3 ubiquitin ligase(DET1)
LYPD6	1.69	0.001	0.966	1.09	0.951	1.714	1.842	1.667	LY6/PLAUR domain containing 6(lypd6)
ZDHHC1	1.69	0.002	2.5	2.984	2.561	4.177	4.241	5.182	zinc finger DHHC-type containing 1(zdhhc1)
WNT3A	1.69	0.03	1.424	0.982	1.697	2.071	2.682	2.09	Wnt family member 3A(WNT3A)
UTP25	1.68	0.025	8.663	12.854	10.881	16.542	22.846	15.278	UTP25 small subunit processor component(utp25)
CCNP	1.67	0.007	0.864	0.323	0.692	1.357	2.018	1.698	cyclin P(CCNP)
PAOX	1.66	0.014	4.266	4.729	3.42	7.657	7.421	5.564	polyamine oxidase(PAOX)
KCNJ5	1.65	0.02	1.422	0.771	0.887	2.079	1.992	1.532	potassium inwardly rectifying channel subfamily J member 5(KCNJ5)
DNAAF10	1.64	0.033	1.054	1.539	1.02	2.095	2.226	1.558	dynein axonemal assembly factor 10(dnaaf10)
ELOVL7	1.64	0.001	58.371	73.796	63.241	110.001	102.101	106.236	ELOVL fatty acid elongase 7(ELOVL7)
DEPDC1B	1.63	0.001	16.405	16.496	13.665	25.318	24.923	25.575	DEP domain containing 1B(DEPDC1B)
FZD8.L	1.63	0.008	3.389	3.296	4.625	6.099	5.678	6.426	frizzled class receptor 8 L homeolog(fzd8.L)
ZGC:112185	1.62	0.028	2.204	2.163	1.432	3.497	2.671	3.13	zgc:112185(zgc:112185)
LYSMD4	1.62	0.018	2.032	1.458	2.086	2.686	3.499	2.802	LysM, putative peptidoglycan-binding, domain containing 4(lysmd4)
ALKAL2	1.62	0.027	7.833	6.446	5.03	9.251	9.43	12.354	ALK and LTK ligand 2(Alkal2)
EPGN	1.62	0.001	22.583	20.985	18.609	34.074	34.335	31.781	epithelial mitogen(EPGN)
IER3	1.61	0.027	37.862	36.54	41.332	52.635	53.992	83.918	immediate early response 3(IER3)
PLXNA2	1.6	0.002	4.99	5.072	4.377	8.367	6.834	7.985	plexin A2(PLXNA2)
EGR3	1.6	0.005	5.435	6.401	5.447	7.928	10.481	9.319	early growth response 3(Egr3)
FAM171A1.L	1.6	0.046	0	1.755	1.102	2.201	1.974	1.817	family with sequence similarity 171 member A1 L homeolog(fam171a1.L)
ANKK1	1.6	0.012	6.34	5.984	5.197	7.554	9.798	10.827	ankyrin repeat and kinase domain containing 1(Ankk1)
SGCD	1.59	0.011	5.281	4.634	3.608	7.695	6.661	6.941	sarcoglycan delta(Sgcd)
DHPS	1.59	0.037	4.636	2.702	4.072	6.216	5.433	6.076	deoxyhypusine synthase(Dhps)
DIPK1C	1.58	0.03	1.312	0.976	1.096	2.127	1.954	1.37	divergent protein kinase domain 1C(DIPK1C)
PPT2	1.58	0.014	1.586	1.261	1.61	2.048	2.204	2.826	palmitoyl-protein thioesterase 2(Ppt2)
CDH2	1.58	0.001	9.548	10.662	10.15	15.357	17.149	15.525	cadherin 2, type 1, N-cadherin (neuronal)(cdh2)
ALG9	1.58	0.001	6.462	6.202	5.561	8.998	9.463	10.265	asparagine-linked glycosylation 9 (alpha 1,2 mannosyltransferase)(Alg9)
HEPACAM2	1.58	0.048	5.42	4.697	3.907	6.505	6.051	9.872	HEPACAM family member 2(HEPACAM2)
ASGR2	1.57	0.043	1.224	1.847	1.771	2.016	2.939	2.631	asialoglycoprotein receptor 2(ASGR2)
PLXNC1	1.57	0.036	3.87	3.219	5.534	6.849	6.303	6.172	plexin C1(PLXNC1)
TENT2	1.57	0.001	6.348	6.025	5.892	9.905	8.883	9.852	terminal nucleotidyltransferase 2(tent2)
BCL2L14	1.56	0.008	46.211	46.282	38.507	67.58	78.756	58.96	BCL2 like 14(BCL2L14)
AGO2.L	1.56	0.029	8.884	5.929	7.502	9.631	13.201	11.788	argonaute 2, RISC catalytic component L homeolog(ago2.L)
OTULIN	1.56	0.017	6.177	4.089	5.665	8.418	8.146	7.902	OTU deubiquitinase with linear linkage specificity(Otulin)
GOLGA4	1.56	0.004	9.716	11.578	12.797	16.609	18.859	17.367	golgin A4(GOLGA4)
TRMT11	1.55	0.049	4.134	3.189	4.052	7.18	6.425	4.334	tRNA methyltransferase 11 homolog(TRMT11)
SPNS3	1.55	0.001	1.028	1.153	1.133	1.688	1.808	1.647	spinster homolog 3 (Drosophila)(spns3)
FOSL1	1.55	0.03	17.9	18.443	13.982	23.598	32.617	22.147	FOS like 1, AP-1 transcription factor subunit(Fosl1)
EGR2B	1.54	0.031	18.102	15.976	11.734	25.384	24.387	20.054	early growth response 2b(egr2b)
NLRP13	1.53	0.022	26.501	21.315	18.758	28.954	38.678	33.561	NLR family pyrin domain containing 13(NLRP13)
YPT1	1.5	0.03	1.57	1.933	2.203	2.643	2.509	3.435	Ras-like GTP-binding protein YPT1(YPT1)
ZFP280D	1.5	0.032	2.941	2.612	2.309	4.141	4.69	3.105	zinc finger protein 280D(Zfp280d)
SETD4	1.5	0.029	0.83	1.189	0.89	1.273	1.956	1.617	SET domain containing 4(Setd4)
RNF222	1.5	0.008	7.473	7.503	5.893	9.682	10.101	11.374	ring finger protein 222(Rnf222)
MXD1	1.49	0.033	1.112	1.623	1.12	2.046	1.658	1.987	MAX dimerization protein 1(MXD1)
INO80E	1.49	0.014	3.065	3.469	3.21	4.132	5.86	4.666	INO80 complex subunit E(INO80E)
N6AMT1	1.49	0.036	3.882	2.965	2.681	5.076	5.164	3.893	N-6 adenine-specific DNA methyltransferase 1 (putative)(N6amt1)
CXCR4.S	1.49	0.011	6.912	8.506	9.41	11.305	13.134	12.301	C-X-C motif chemokine receptor 4 S homeolog(cxcr4.S)
CCDC84	1.49	0.05	2.064	1.603	1.313	2.776	2.056	2.497	coiled-coil domain containing 84(Ccdc84)
ZCCHC4	1.48	0.009	1.872	2.164	1.587	2.661	2.952	2.674	zinc finger CCHC-type containing 4(zcchc4)
HI_0077	1.48	0.016	1.337	1.202	0.848	1.602	1.626	2	Uncharacterized protein HI_0077(HI_0077)
EIF1AD	1.48	0.046	6.16	7.864	6.873	13.078	9.923	8.25	eukaryotic translation initiation factor 1A domain containing(eif1ad)
RBFA	1.48	0.041	1.284	1.604	0.93	1.796	2.075	1.776	ribosome binding factor A(RBFA)
GARNL3	1.47	0.047	5.158	4.439	3.634	7.044	7.361	5.139	GTPase activating Rap/RanGAP domain like 3(garnl3)
FNIP1	1.47	0.01	15.808	12.107	13.64	19.409	22.738	18.915	folliculin interacting protein 1(FNIP1)
OPA1	1.47	0.025	7.601	5.567	5.121	8.375	8.789	9.398	OPA1 mitochondrial dynamin like GTPase(opa1)
DDX56	1.46	0.006	7.955	8.259	7.432	13.384	10.713	10.667	DEAD-box helicase 56(DDX56)
DMWD	1.46	0.014	2.801	2.123	2.752	4.117	3.505	3.526	DM1 locus, WD repeat containing(DMWD)
HHLA2	1.45	0.007	27.389	29.443	28.053	35.102	45.844	42.938	HERV-H LTR-associating 2(HHLA2)
SVBP	1.45	0.047	11.207	10.812	10.047	12.332	14.972	20.102	small vasohibin binding protein(svbp)
EN1	1.44	0.041	2.937	3.25	4.1	4.411	4.496	5.895	engrailed homeobox 1(EN1)
WNT11F2	1.44	0.038	4.946	5.124	3.724	5.565	7.482	6.735	wnt 11, family member 2(wnt11f2)
SSBP1	1.43	0.002	4.721	5.177	4.493	7.403	6.633	6.489	single stranded DNA binding protein 1(SSBP1)
KIN	1.42	0.001	4.053	4.201	4.535	6.349	5.842	5.984	Kin17 DNA and RNA binding protein(Kin)
SIL1	1.42	0.017	8.325	6.368	7.268	11.655	9.264	10.258	SIL1 nucleotide exchange factor(SIL1)
OSBPL9	1.42	0.011	18.055	24.472	20.149	29.481	29.037	29.808	oxysterol binding protein-like 9(Osbpl9)
RRP8	1.42	0.021	3.092	2.62	2.818	4.43	4.428	3.33	ribosomal RNA processing 8(Rrp8)
SORD	1.42	0.002	1.581	1.854	1.874	2.54	2.473	2.497	sorbitol dehydrogenase(SORD)
HEATR1	1.42	0.045	10.147	11.881	9.065	12.259	17.861	14.194	HEAT repeat containing 1(heatr1)
NOL8	1.42	0.035	8.288	6.943	6.193	11.038	10.946	8.381	nucleolar protein 8(Nol8)
TSEN34	1.42	0.024	1.397	1.138	1.086	1.474	1.713	1.94	tRNA splicing endonuclease subunit 34(TSEN34)
KLF7	1.41	0.021	3.718	4.974	3.743	5.365	6.252	5.83	Kruppel-like factor 7 (ubiquitous)(Klf7)
CFHR2	1.41	0.049	8.909	11.9	13.848	16.882	16.702	14.688	complement factor H related 2(CFHR2)
TMED5	1.4	0.018	5.868	5.369	6.243	9.002	6.837	8.862	transmembrane p24 trafficking protein 5(TMED5)
EI24	1.4	0.016	9.6	12.655	10.464	16.716	14.114	14.854	EI24 autophagy associated transmembrane protein(EI24)
WNT7A	1.4	0.005	5.334	5.484	5.279	6.996	8.616	7.055	Protein Wnt-7a(WNT7A)
AVEN	1.4	0.043	1.385	1.045	1.341	1.458	1.853	1.971	apoptosis and caspase activation inhibitor(AVEN)
HYAL1	1.4	0.039	2.454	2.408	2.834	3.086	4.449	3.328	hyaluronidase 1(HYAL1)
MACC1	1.39	0.015	27.748	23.27	20.243	32.595	32.443	33.306	MET transcriptional regulator MACC1(MACC1)
SI:DKEY-184P18.2	1.39	0.028	10.587	8.206	9.278	13.854	14.117	10.986	si:dkey-184p18.2(si:dkey-184p18.2)
TMEM101	1.39	0.005	3.907	3.578	3.848	4.759	5.104	5.894	transmembrane protein 101(TMEM101)
DCUN1D2	1.38	0.031	4.747	6.173	6.345	7.167	8.822	7.767	defective in cullin neddylation 1 domain containing 2(DCUN1D2)
SERPINE1	1.38	0.025	182.063	173.659	148.456	222.854	271.058	204.781	serpin family E member 1(Serpine1)
S1PR1	1.38	0.006	21.775	25.989	26.547	35.181	34.604	32.289	sphingosine-1-phosphate receptor 1(S1pr1)
ANAPC7	1.38	0.043	6.659	5.537	6.084	8.173	7.008	10.183	anaphase promoting complex subunit 7(ANAPC7)
ATG4B	1.37	0.021	3.188	3.037	3.845	4.353	4.258	5.217	autophagy related 4B, cysteine peptidase(atg4b)
CDC123	1.37	0.009	3.432	3.744	4.298	5.184	4.921	5.616	cell division cycle 123 homolog (S. cerevisiae)(cdc123)
ZNF558	1.37	0.032	4.295	3.356	3.281	4.533	5.667	4.755	zinc finger protein 558(ZNF558)
ABHD11	1.37	0.03	4.4	5.168	5.877	7.876	7	6.257	abhydrolase domain containing 11(abhd11)
GLIPR1L1	1.37	0.037	0.587	1.148	0.539	1.246	1.351	1.76	GLIPR1 like 1(GLIPR1L1)
PHF11D	1.37	0.002	3.419	2.875	3.2	4.207	4.488	4.283	PHD finger protein 11D(Phf11d)
MN1	1.37	0.035	0.452	1.017	0.901	1.458	1.111	1.616	meningioma 1(Mn1)
MRPS9	1.37	0.04	9.702	12.493	9.223	15.096	12.37	15.312	mitochondrial ribosomal protein S9(MRPS9)
ROR1	1.37	0.031	0.896	0.824	1.097	1.732	1.256	1.288	receptor tyrosine kinase like orphan receptor 1(ROR1)
RUSC2	1.37	0.034	9.67	7.679	11.181	12.762	12.703	13.07	RUN and SH3 domain containing 2(Rusc2)
ATG4C	1.36	0.036	1.43	2.072	1.673	2.227	2.456	2.301	autophagy related 4C cysteine peptidase(ATG4C)
CFP	1.36	0.015	12.097	13.164	11.604	15.032	19.481	15.989	complement factor properdin(Cfp)
NAT10	1.36	0.036	7.181	7.858	6.03	9.238	11.022	8.416	N-acetyltransferase 10(NAT10)
SENP5	1.36	0.026	1.859	2.218	2.088	2.92	3.137	2.365	SUMO/sentrin specific peptidase 5(Senp5)
TMEM68	1.36	0.046	3.901	3.149	4.443	4.552	5.634	5.351	transmembrane protein 68(TMEM68)
EPHA7	1.36	0.025	20.303	15.77	19.316	26.202	26.803	22.078	EPH receptor A7(EPHA7)
SPON2	1.36	0.008	4.18	4.079	3.668	6.017	5.299	4.906	spondin 2(SPON2)
DNTTIP2	1.36	0.01	25.925	29.876	28.381	42.808	37.107	34.511	deoxynucleotidyltransferase terminal interacting protein 2(DNTTIP2)
RABEP1	1.36	0.001	4.712	5.26	4.688	6.854	6.463	6.532	rabaptin, RAB GTPase binding effector protein 1(Rabep1)
DCLRE1C	1.35	0.014	0.301	1.131	1.264	1.666	1.502	1.415	DNA cross-link repair 1C, PSO2 homolog (S. cerevisiae)(dclre1c)
UTP15	1.35	0.03	31.858	28.405	28.843	43.886	44.328	33.148	UTP15 small subunit processome component(utp15)
GLE1	1.35	0.016	4.473	4.08	3.595	6.097	5.185	5.107	GLE1 RNA export mediator(GLE1)
CACNA2D1	1.35	0.01	8.16	6.844	7.173	10.877	9.059	9.958	calcium channel, voltage-dependent, alpha2/delta subunit 1(Cacna2d1)
ITGAM	1.35	0.031	19.539	26.708	25.77	32.886	32.735	30.477	integrin alpha M(Itgam)
EIF2B1	1.34	0.039	7.138	8.885	7.235	12.146	9.172	10.011	eukaryotic translation initiation factor 2B subunit alpha(EIF2B1)
SLC7A5	1.34	0.03	8.923	7.611	9.673	10.273	11.826	13.127	solute carrier family 7 member 5(Slc7a5)
CIAO2B	1.34	0.02	12.174	13.753	11.172	17.496	17.804	14.559	cytosolic iron-sulfur assembly component 2B(Ciao2b)
EXOC5	1.34	0.003	4.159	4.112	3.738	5.065	5.259	5.783	exocyst complex component 5(EXOC5)
USP43	1.34	0.004	12.498	10.988	10.386	14.595	15.003	15.584	ubiquitin specific peptidase 43(USP43)
SKAP2	1.34	0.037	4.67	4.191	5.299	7.34	5.619	6.008	src kinase associated phosphoprotein 2(skap2)
ZFP592	1.34	0.037	5.474	5.293	4.057	6.671	6.985	6.006	zinc finger protein 592(Zfp592)
MICAL2	1.33	0.046	7.534	9.122	9.229	12.397	12.694	9.571	microtubule associated monooxygenase, calponin and LIM domain containing 2(Mical2)
CRIPT	1.33	0.015	28.479	28.347	30.94	40.934	43.006	33.676	cysteine-rich PDZ-binding protein(cript)
POLR3B	1.33	0.044	1.96	2.044	1.98	2.564	3.257	2.242	polymerase (RNA) III (DNA directed) polypeptide B(Polr3b)
SURF6	1.33	0.02	10.677	12.649	9.713	14.156	15.73	13.897	surfeit 6(surf6)
NUDCD1	1.33	0.034	3.281	2.983	2.497	3.885	4.271	3.457	NudC domain containing 1(nudcd1)
ATP6V1A	1.33	0.02	33.864	38.75	32.273	43.067	52.77	43.553	ATPase H+ transporting V1 subunit A(ATP6V1A)
SH3BP4	1.33	0.034	13.634	10.658	10.583	14.889	14.154	17.043	SH3 domain-binding protein 4(sh3bp4)
GRB7	1.33	0.023	7.806	8.588	10.24	10.994	12.581	11.573	growth factor receptor bound protein 7(Grb7)
RASA3	1.33	0.027	9.545	9.749	9.09	10.878	12.214	14.844	RAS p21 protein activator 3(RASA3)
STARD10	1.32	0.005	30.787	29.95	25.835	38.438	36.513	39.443	START domain containing 10(Stard10)
ZGPAT	1.32	0.025	2.199	1.91	1.772	2.596	2.305	2.868	zinc finger, CCCH-type with G patch domain(zgpat)
ZFYVE1	1.32	0.015	7.756	9.023	8.767	12.185	11.637	9.957	zinc finger, FYVE domain containing 1(Zfyve1)
WEE1.S	1.32	0.007	8.255	8.242	7.873	11.295	11.474	9.487	WEE1 G2 checkpoint kinase S homeolog(wee1.S)
ATRAID	1.32	0.002	2.97	3.402	3.342	4.265	4.278	4.248	all-trans retinoic acid-induced differentiation factor(atraid)
ATP6AP2	1.32	0.002	31.159	30.277	28.005	40.428	37.102	40.335	ATPase H+ transporting accessory protein 2(ATP6AP2)
SLC39A1	1.32	0.044	9.578	9.079	7.001	11.753	11.551	10.264	solute carrier family 39 member 1(slc39a1)
FGD6	1.32	0.04	3.249	3.105	3.498	4.147	5.192	3.746	FYVE, RhoGEF and PH domain containing 6(FGD6)
MTHFD2	1.32	0.004	24.746	22.185	24.039	29.799	29.873	33.825	methylenetetrahydrofolate dehydrogenase (NADP+ dependent) 2, methenyltetrahydrofolate cyclohydrolase(MTHFD2)
NPL	1.32	0.02	14.551	17.892	14.766	19.495	19.786	22.714	N-acetylneuraminate pyruvate lyase (dihydrodipicolinate synthase)(npl)
LOC110486982	1.32	0.014	32.302	36.994	38.216	52.458	44.503	44.547	cytochrome P450 2K1-like(LOC110486982)
DACH1	1.32	0.037	3.198	2.435	2.43	3.515	3.739	3.275	dachshund family transcription factor 1(Dach1)
FBXO25	1.32	0.037	4.516	4.03	5.43	5.778	6.69	5.814	F-box protein 25(FBXO25)
SGCB	1.31	0.014	5.304	4.875	4.294	6.711	6.429	5.847	sarcoglycan beta(SGCB)
GFPT2	1.31	0.013	129.074	124.008	102.401	150.28	156.104	158.57	glutamine-fructose-6-phosphate transaminase 2(GFPT2)
SLC34A2	1.31	0.039	2.72	3.225	2.994	4.519	3.929	3.342	solute carrier family 34 member 2(Slc34a2)
RIF1	1.31	0.007	11.422	11.045	9.693	14.652	14.392	13.097	replication timing regulatory factor 1(RIF1)
LPGAT1	1.31	0.002	5.542	5.402	4.988	7.35	6.941	6.563	lysophosphatidylglycerol acyltransferase 1(Lpgat1)
EVI5L	1.31	0.014	0.916	1.083	1.063	1.339	1.234	1.56	ecotropic viral integration site 5 like(EVI5L)
RCAN1	1.31	0.05	85.487	104.397	85.189	110.251	141	109.46	regulator of calcineurin 1(Rcan1)
PCK2	1.31	0.029	12.188	15.434	15.196	17.907	20.374	17.518	phosphoenolpyruvate carboxykinase 2, mitochondrial(PCK2)
CADM4.L	1.31	0.005	1.503	1.774	1.702	2.177	2.078	2.238	cell adhesion molecule 4 L homeolog(cadm4.L)
SDC2	1.31	0.019	21.114	20.664	17.018	27.135	25.642	23.769	syndecan 2(Sdc2)
DDX19B	1.31	0.034	2.622	2.311	2.063	3.432	2.774	2.923	DEAD-box helicase 19B(DDX19B)
TWIST2	1.31	0.03	20.804	18.936	18.01	26.567	27.722	21.424	twist family bHLH transcription factor 2(Twist2)
INAVA	1.3	0.008	8.437	7.412	9.054	10.71	10.432	11.25	innate immunity activator(Inava)
ARHGEF10	1.3	0.038	14.161	14.711	12.327	18.812	19.832	15.252	Rho guanine nucleotide exchange factor 10(ARHGEF10)
YPEL1	1.3	0.001	12.748	13.164	12.604	17.779	15.608	16.872	yippee like 1(YPEL1)
BHLHE41	1.3	0.017	8.738	7.38	9.481	10.745	11.16	11.178	basic helix-loop-helix family member e41(BHLHE41)
SLC33A1	1.3	0.019	8.75	7.599	7.372	11.424	9.867	9.518	solute carrier family 33 (acetyl-CoA transporter), member 1(Slc33a1)
SLC35B1	1.3	0.025	27.587	25.69	22.292	34.258	34.63	29.121	solute carrier family 35 member B1(slc35b1)
TBX2B	1.3	0.016	13.187	16.678	15.834	20.381	19.056	19.556	T-box transcription factor 2b(tbx2b)
RNF4	1.3	0.039	9.873	7.72	7.24	10.769	10.753	10.388	ring finger protein 4(RNF4)
HS6ST2	1.29	0.014	7.514	6.587	6.283	8.821	8.096	9.441	heparan sulfate 6-O-sulfotransferase 2(hs6st2)
MAML2	1.29	0.017	6.454	6.951	6.597	9.411	9.055	7.494	mastermind like transcriptional coactivator 2(MAML2)
CNPY2	1.29	0.009	9.365	11.193	11.086	13.024	13.994	13.746	canopy FGF signaling regulator 2(CNPY2)
PUS1	1.29	0.013	2.461	2.74	2.225	3.091	3.396	3.082	pseudouridine synthase 1(Pus1)
RICTOR	1.29	0.022	18.264	21.318	16.706	22.714	25.657	24.048	RPTOR independent companion of MTOR, complex 2(Rictor)
PXDC1	1.29	0.048	4.221	5.53	4.042	5.67	5.922	5.998	PX domain containing 1(Pxdc1)
BAMBI	1.29	0.041	55.641	75.63	69.631	84.615	88.805	82.958	BMP and activin membrane bound inhibitor(BAMBI)
CRYBG2	1.28	0.041	22.745	19.565	17.563	26.756	22.771	27.149	crystallin beta-gamma domain containing 2(CRYBG2)
STX8	1.28	0.024	4.107	3.267	3.481	4.535	4.355	4.987	syntaxin 8(STX8)
ITGA3	1.28	0.008	11.529	13.206	11.37	16.185	14.455	15.548	integrin subunit alpha 3(ITGA3)
PEX3	1.28	0.005	2.397	2.215	2.373	3.101	2.72	3.131	peroxisomal biogenesis factor 3(PEX3)
ICMT.S	1.28	0.038	4.867	5.121	3.996	6.437	5.928	5.444	isoprenylcysteine carboxyl methyltransferase S homeolog(icmt.S)
PRSS1	1.27	0.001	1.299	1.313	1.415	1.772	1.68	1.674	serine protease 1(prss1)
MBD1	1.27	0.024	4.439	4.54	4.582	5.074	6.607	5.689	methyl-CpG binding domain protein 1(MBD1)
CRYL1	1.27	0.001	3.08	2.962	3.064	3.893	4.022	3.668	crystallin lambda 1(CRYL1)
DENND1A.S	1.27	0.004	6.431	6.95	6.781	9.24	8.019	8.404	DENN domain containing 1A S homeolog(dennd1a.S)
DDX10	1.27	0.011	6.309	5.884	5.274	7.827	7.114	7.182	DEAD-box helicase 10(DDX10)
USP24	1.27	0.003	22.418	22.915	24.312	31.568	27.965	28.854	ubiquitin specific peptidase 24(Usp24)
TMEM250	1.27	0.023	2.95	2.744	2.39	3.602	3.142	3.477	transmembrane protein 250(TMEM250)
CSSA07H4ORF48	1.27	0.001	13.065	12.391	11.642	15.614	15.606	15.682	chromosome ssa07 C4orf48 homolog(cssa07h4orf48)
THEMIS	1.26	0.024	1.802	1.789	2.199	2.417	2.307	2.565	thymocyte selection associated(themis)
DUSP3	1.26	0.023	2.159	2.549	2.759	3.13	3.084	3.17	dual specificity phosphatase 3(DUSP3)
DTHADH	1.26	0.024	2.932	3.513	3.531	4.524	3.944	4.106	D-threo-3-hydroxyaspartate dehydratase(dthadh)
ARRDC3	1.26	0.041	78.331	76.194	66.062	101.751	96.503	80.823	arrestin domain containing 3(ARRDC3)
PDAP1	1.26	0.036	22.453	19.376	17.635	27.079	24.609	23.146	PDGFA associated protein 1(PDAP1)
MICALL2	1.26	0.011	19.629	21.692	22.822	26.347	29.046	25.486	MICAL-like 2(Micall2)
RAB11FIP3	1.26	0.047	5.601	6.801	5.217	8.034	6.962	7.12	RAB11 family interacting protein 3 (class II)(rab11fip3)
EMP3	1.26	0.029	18.88	16.347	18.685	21.569	20.933	25.575	epithelial membrane protein 3(Emp3)
SERC	1.26	0.041	35.864	40.864	39.813	44.535	56.841	46.065	3-phosphoserine/phosphohydroxythreonine transaminase(serC)
RAB43	1.25	0.017	4.07	4.852	4.548	5.266	6.03	5.589	RAB43, member RAS oncogene family(RAB43)
SLC25A1B	1.25	0.039	15.45	16.28	20.216	21.251	21.897	21.472	slc25a1 solute carrier family 25 member 1b(slc25a1b)
IRF6	1.25	0.049	63.261	64.257	63.45	75.163	70.964	94.864	interferon regulatory factor 6(IRF6)
PPT1	1.25	0.04	24.616	24.721	31.462	33.547	34.409	32.479	palmitoyl-protein thioesterase 1(PPT1)
PLK3	1.25	0.043	25.188	27.09	24.282	29.428	29.454	37.229	polo like kinase 3(PLK3)
IFNGR1L	1.25	0.017	11.795	14.399	13.624	16.054	16.243	17.217	Interferon gamma receptor 1-like(ifngr1l)
PIGO	1.25	0.037	1.59	1.263	1.492	1.726	1.946	1.725	phosphatidylinositol glycan anchor biosynthesis, class O(Pigo)
UXS1	1.25	0.004	4.6	4.371	4.515	5.649	5.982	5.194	UDP-glucuronate decarboxylase 1(uxs1)
TGFBR3	1.25	0.034	13.237	16.588	13.126	17.398	17.641	18.157	transforming growth factor, beta receptor III(Tgfbr3)
EGR1	1.24	0.047	139.213	180.725	175.564	196.281	206.164	209.753	early growth response 1(EGR1)
UBE2G2	1.24	0.019	12.662	13.938	11.707	15.761	16.998	14.814	ubiquitin conjugating enzyme E2 G2(UBE2G2)
SLC22A31	1.24	0.031	4.841	4.503	3.989	5.323	6.057	5.173	solute carrier family 22 member 31(SLC22A31)
KCNJ2	1.24	0.021	5.635	5.193	5.193	6.698	7.314	5.946	Potassium inwardly rectifying channel subfamily J member 2(KCNJ2)
HTRA2	1.24	0.001	13.266	12.888	13.032	15.664	17.208	15.837	HtrA serine peptidase 2(HTRA2)
ERLIN1	1.24	0.045	16.03	18.327	14.068	19.155	21.272	19.424	ER lipid raft associated 1(erlin1)
PEX5	1.24	0.006	2.77	2.393	2.734	3.252	3.245	3.277	peroxisomal biogenesis factor 5(PEX5)
SSBP3	1.24	0.027	12.507	11.439	10.686	14.345	12.979	15.606	single stranded DNA binding protein 3(SSBP3)
KDSR	1.24	0.028	2.881	3.421	2.864	3.691	3.56	4.081	3-ketodihydrosphingosine reductase(KDSR)
ABHD6	1.24	0.024	3.704	4.394	4.236	5.195	5.378	4.662	abhydrolase domain containing 6, acylglycerol lipase(Abhd6)
MMP9	1.23	0.012	1032.16	1109.67	990.941	1371.47	1307.82	1187.15	matrix metallopeptidase 9(MMP9)
ASH2L	1.23	0.027	8.971	9.5	9.425	12.424	10.042	12.058	ASH2 like histone lysine methyltransferase complex subunit(Ash2l)
BIRC2	1.23	0.03	59.161	53.51	52.216	67.943	74.783	60.899	baculoviral IAP repeat containing 2(BIRC2)
SULF1	1.23	0.039	8.345	10.339	8.964	11.817	11.782	10.361	sulfatase 1(Sulf1)
NOL12	1.23	0.048	15.008	12.978	12.426	15.253	18.51	15.96	nucleolar protein 12(nol12)
RFNG	1.23	0.015	21.764	19.616	17.929	24.664	23.736	24.331	RFNG O-fucosylpeptide 3-beta-N-acetylglucosaminyltransferase(rfng)
ATG4A	1.23	0.04	6.337	7.035	5.933	8.767	7.16	7.826	autophagy related 4A cysteine peptidase(ATG4A)
PPP2R3A	1.23	0.029	16.299	13.35	13.452	17.097	17.294	18.387	protein phosphatase 2 regulatory subunit B''alpha(PPP2R3A)
EXTL3	1.23	0.014	3.807	3.818	4.086	5.103	4.336	4.981	exostosin like glycosyltransferase 3(EXTL3)
MAP1LC3B	1.23	0.026	21.222	24.935	25.319	28.011	31.365	28.305	microtubule-associated protein 1 light chain 3 beta(Map1lc3b)
CIR1	1.23	0.035	5.997	5.189	5.133	6.382	6.258	7.416	corepressor interacting with RBPJ, 1(CIR1)
EDRF1	1.23	0.008	9.646	10.597	9.575	11.463	12.878	12.267	erythroid differentiation regulatory factor 1(EDRF1)
BSPRY	1.23	0.016	3.521	3.278	2.937	4.134	3.949	3.822	B-box and SPRY domain containing(Bspry)
VAMP5	1.22	0.007	35.059	39.124	40.003	47.091	44.858	47.557	vesicle-associated membrane protein 5(Vamp5)
GRPEL1	1.22	0.032	17.827	20.78	19.757	26.336	22.673	22.377	GrpE like 1, mitochondrial(GRPEL1)
TASP1	1.22	0.035	4.545	4.653	5.27	6.476	5.372	5.833	taspase, threonine aspartase 1(Tasp1)
PLK2	1.22	0.029	27.268	24.64	23.39	33.467	30.077	28.325	polo like kinase 2(PLK2)
VSIR	1.22	0.037	23.929	26.082	28.285	29.274	31.133	35.054	V-set immunoregulatory receptor(Vsir)
SDF4	1.21	0.046	30.124	37.628	32.795	40.356	43.352	38.034	stromal cell derived factor 4(sdf4)
FAM204A	1.21	0.027	2.547	2.989	2.586	3.055	3.468	3.318	family with sequence similarity 204 member A(FAM204A)
SALL3	1.21	0.028	1.668	1.616	1.839	2.283	1.995	1.939	spalt like transcription factor 3(Sall3)
TAF5	1.21	0.015	3.963	4.295	3.989	5.411	4.763	4.68	TATA-box binding protein associated factor 5(TAF5)
SLX1A.L	1.21	0.018	6.152	7.024	6.392	7.799	8.462	7.408	SLX1 homolog A, structure-specific endonuclease subunit L homeolog(slx1a.L)
RNF146	1.21	0.009	12.308	13.747	13.07	15.996	16.512	14.808	ring finger protein 146(rnf146)
ADCY6	1.21	0.003	3.565	3.62	3.268	4.208	4.102	4.32	adenylate cyclase 6(ADCY6)
NFXL1	1.21	0.043	8.203	9.107	7.82	10.721	10.608	9.04	nuclear transcription factor, X-box binding like 1(NFXL1)
FGL2	1.21	0.041	45.908	54.808	45.26	55.548	62.175	57.876	fibrinogen like 2(FGL2)
TOP2B	1.21	0.003	13.987	15.177	15.109	18.599	17.495	17.296	topoisomerase (DNA) II beta(TOP2B)
SEC61A	1.21	0.018	78.577	69.69	75.517	96.543	89.723	83.587	Protein transport protein Sec61 subunit alpha(sec61a)
MARVELD2	1.2	0.041	18.628	20.25	17.078	22.928	24.054	20.411	MARVEL domain containing 2(marveld2)
GCGR	1.2	0.005	2.844	3.098	2.815	3.448	3.408	3.683	glucagon receptor(Gcgr)
EDEM1	1.2	0.046	17.196	20.39	17.267	22.255	23.329	20.173	ER degradation enhancer, mannosidase alpha-like 1(Edem1)
ADAMTS15	1.2	0.032	20.854	25.157	22.263	27.378	28.598	25.783	a disintegrin-like and metallopeptidase (reprolysin type) with thrombospondin type 1 motif, 15(Adamts15)
